# Supplementary material for: Fabrication of MMO–TiO2 one-dimensional photonic crystal and its application as a colorimetric sensor
Source: Royal Society of Chemistry journal article supplement (doi:10.1039/c2jm31560b), 2012-01-01
Supplement: c2jm31560b.pdf [file c2jm31560b.pdf]

# Electronic Supplementary Information for Fabrication of MMO/TiO<sub>2</sub> One-Dimensional Photonic Crystal and its Application as a Colorimetric Sensor

Yibo Dou, Jingbin Han, Tengli Wang, Min Wei,\* David G. Evans, and Xue Duan

*State Key Laboratory of Chemical Resource Engineering, Beijing University of Chemical  
Technology, Beijing 100029, P. R. China*

## CORRESPONDING AUTHOR FOOTNOTE

\* Corresponding author. Phone: +86-10-64412131. Fax: +86-10-64425385. E-mail:  
weimin@mail.buct.edu.cn.

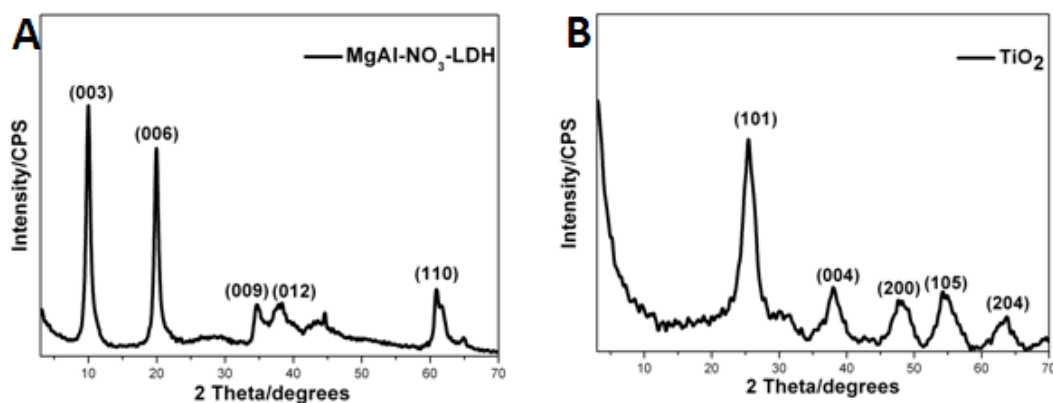

**Figure S1.** Powder XRD patterns of the (A) MgAl-NO<sub>3</sub> LDH and (B) TiO<sub>2</sub>.

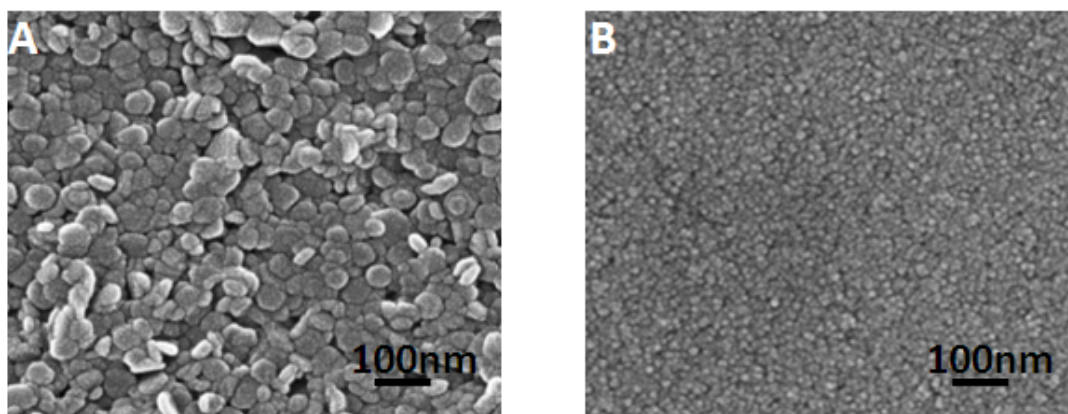

Figure S2. SEM images of the (A) MgAl-NO<sub>3</sub> LDH and (B) TiO<sub>2</sub>.

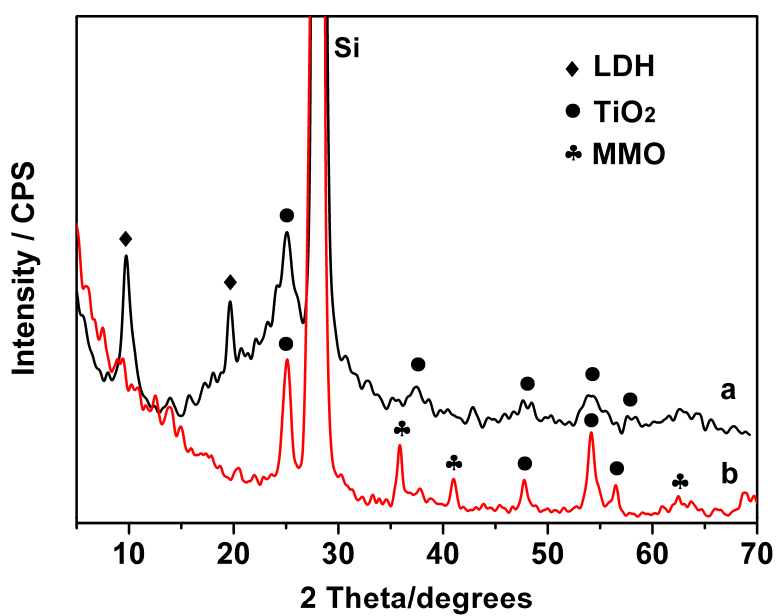

Figure S3. XRD patterns of the 1DPC film before (a) and after (b) calcination.

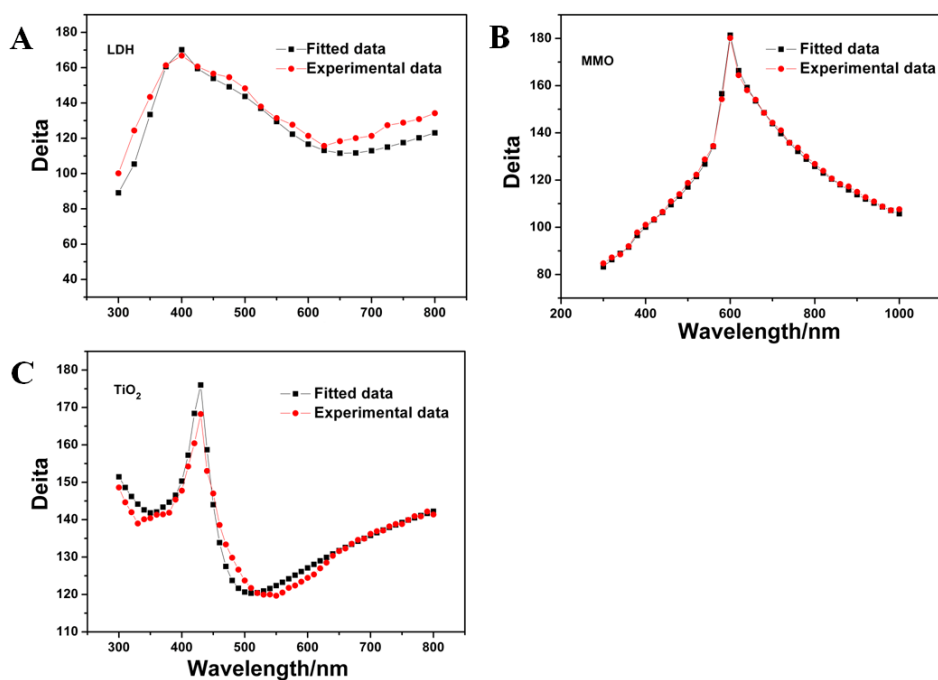

**Figure S4.** The experimental and fitted curves obtained by ellipsometric spectra for: (A) LDH, (B) MMO and (C) TiO<sub>2</sub>.

The modeling and fitting of the ellipsometric spectra were performed using the software provided by the manufacturer. The data obtained were fitted to a Cauchy model, which assumes that the real part of the refractive index ( $n$ ) can be described by:

$$n(\lambda) = A + \frac{B}{\lambda^2} + \frac{C}{\lambda^4} \quad (1)$$

where  $A$ ,  $B$  and  $C$  are constants and  $\lambda$  is the wavelength. The values of the refractive index reported in this work were determined at 633 nm.

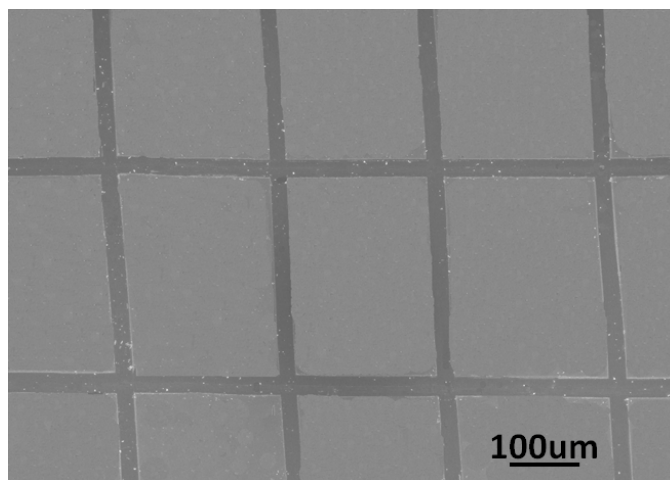

**Figure S5.** The MMO/TiO<sub>2</sub> film tested for adhesion.

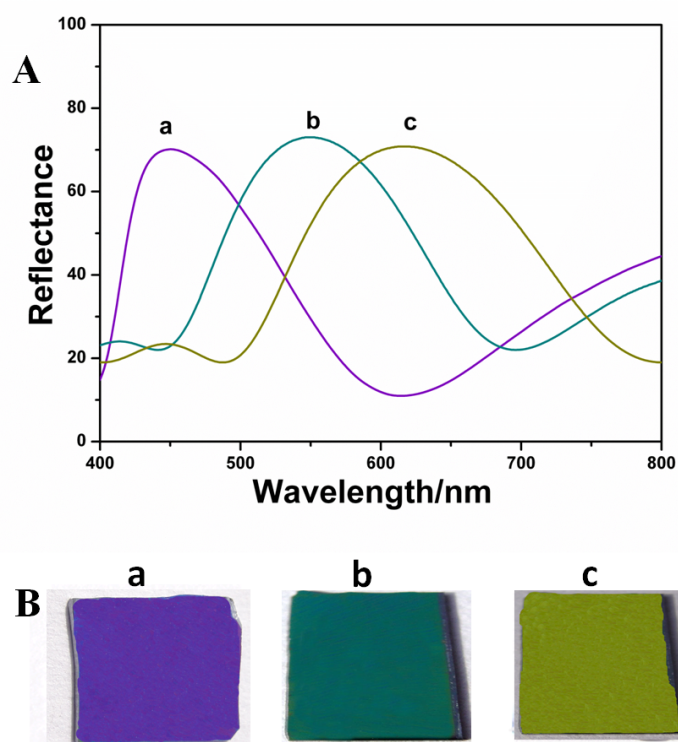

**Figure S6.** (A) Optical spectra and (B) digital photographs showing full visible range colors by thickness modulation of three 1DPC samples (MMO/TiO<sub>2</sub>)<sub>n</sub> ( $n=6$ ) (the thickness of TiO<sub>2</sub> is constant with 76 nm and the thickness of MMO are 70, 106 and 133 nm for a, b and c respectively).

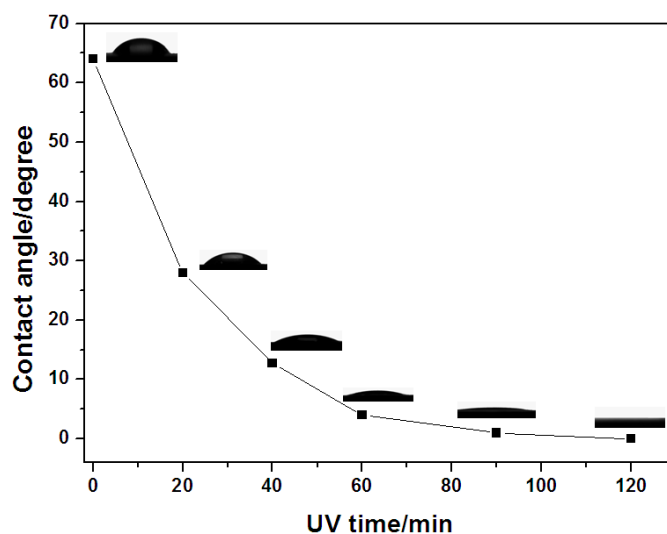

**Figure S7.** The change of water-contact angle for the  $(\text{MMO}/\text{TiO}_2)_6$  1DPC as a function of UV irradiation time.

The UV-illuminated humidity sensor shows self-cleaning property. As show in Figure S7, the surface of the  $(\text{MMO}/\text{TiO}_2)_6$  1DPC contaminated with oleic acid displays a contact angle of  $64^\circ$  initially. Upon UV irradiation, its contact angle decreases gradually to  $\sim 0^\circ$  after 120 min, facilitating a fast spread of water droplet. Therefore, the 1DPC film displays self-cleaning property, possibly owing to the photocatalytic degradation of contaminant *via*  $\text{TiO}_2$ .
